# Supplementary material
Source: MDPI journal article supplement (https://www.mdpi.com/2071-1050/16/5/1770)
Supplement: s1 [file s1]

## Supplementary Materials

# Unravelling the Role of Biochemical Compounds within the Hydrothermal Liquefaction Process of Real Sludge Mixtures

Marco Balsamo <sup>1</sup>, Francesca Di Lauro <sup>1,2,\*</sup>, Maria Laura Alfieri <sup>1</sup>, Paola Manini <sup>1</sup>, Piero Salatino <sup>2</sup>, Fabio Montagnaro <sup>1,\*</sup> and Roberto Solimene <sup>3</sup>

<sup>1</sup> Department of Chemical Sciences, University of Naples Federico II, Complesso Universitario di Monte Sant'Angelo, 80126 Napoli, Italy; marco.balsamo@unina.it (M.B.); marialaura.alfieri@unina.it (M.L.A.); paola.manini@unina.it (P.M.)

<sup>2</sup> Department of Chemical, Materials and Production Engineering, University of Naples Federico II, Piazzale V. Tecchio 80, 80125 Napoli, Italy; piero.salatino@unina.it

<sup>3</sup> Institute of Sciences and Technologies for Sustainable Energy and Mobility, National Research Council, Piazzale V. Tecchio 80, 80125 Napoli, Italy; roberto.solimene@stems.cnr.it

\* Correspondence: francesca.dilauro2@unina.it (F.D.L.); fabio.montagnaro@unina.it (F.M.); Tel.: +39-081-674029 (F.M.)

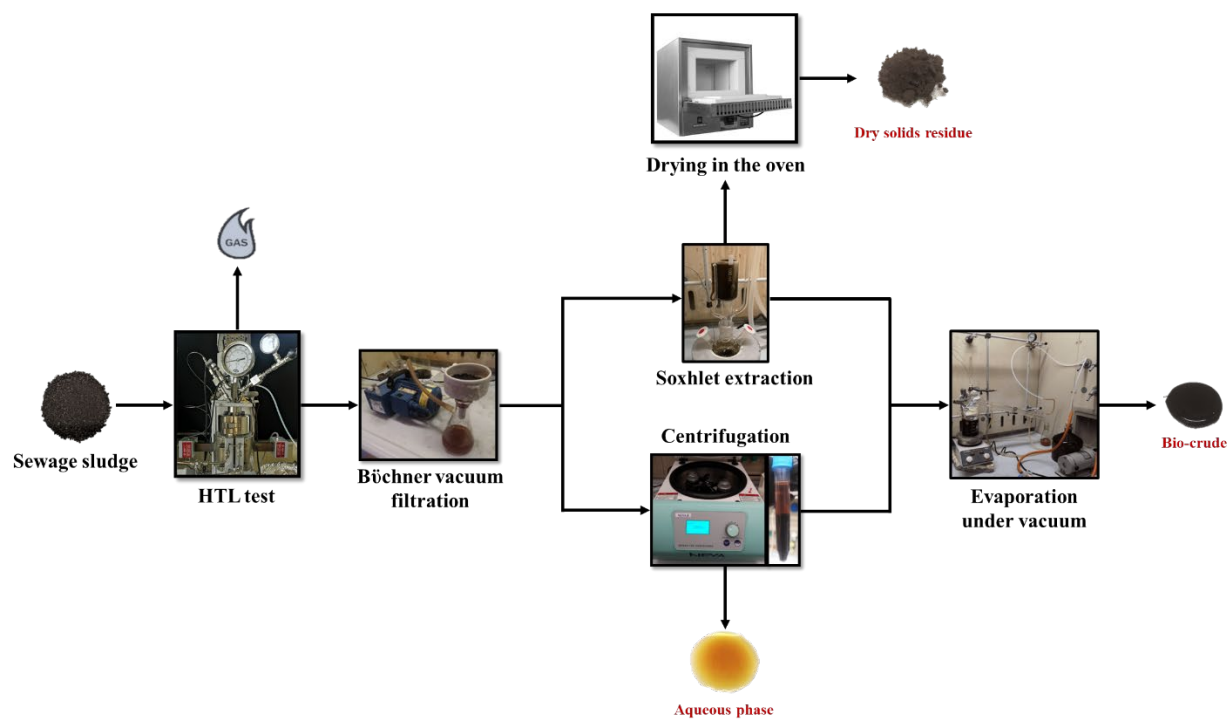

**Figure S1.** HTL products separation steps.

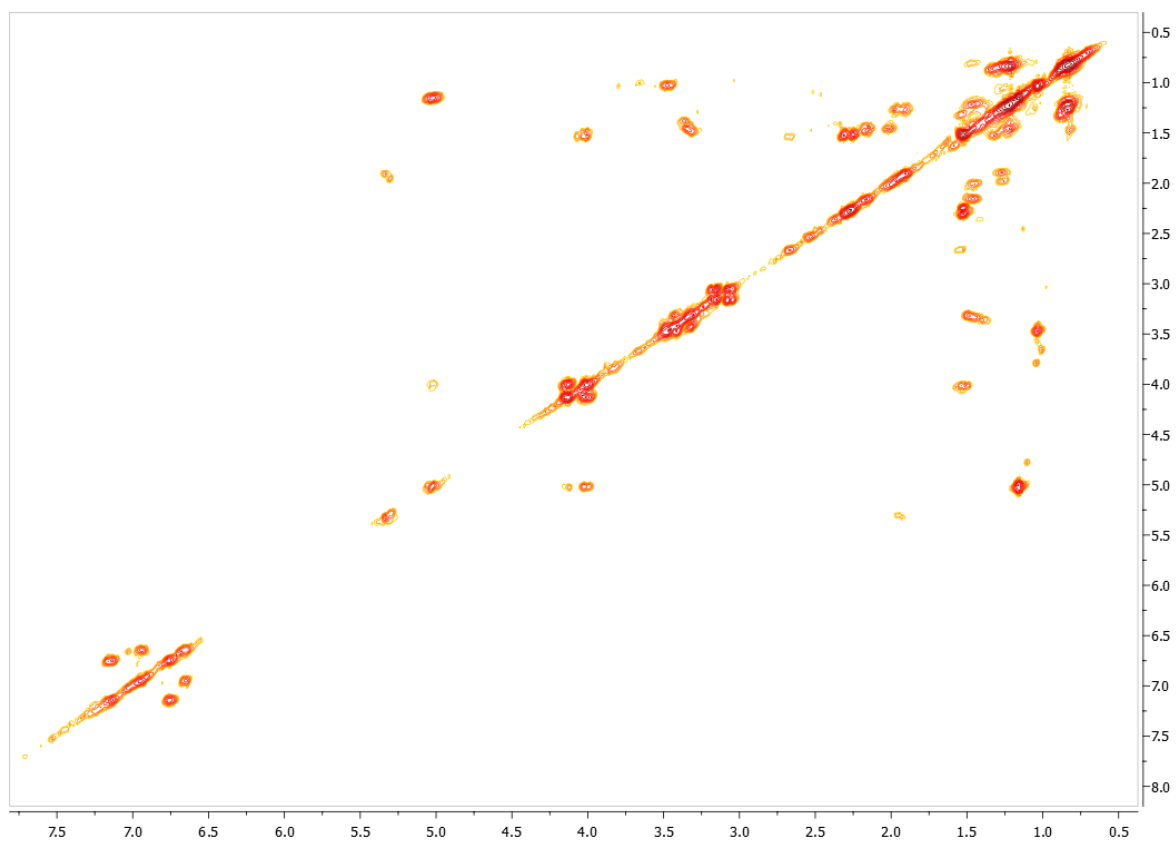

**Figure S2.**  $^1\text{H}$ ,  $^1\text{H}$ -COSY spectrum (DMSO- $d_6$ ) of the bio-crude fraction obtained at 350 °C and 10 min from pure TS.

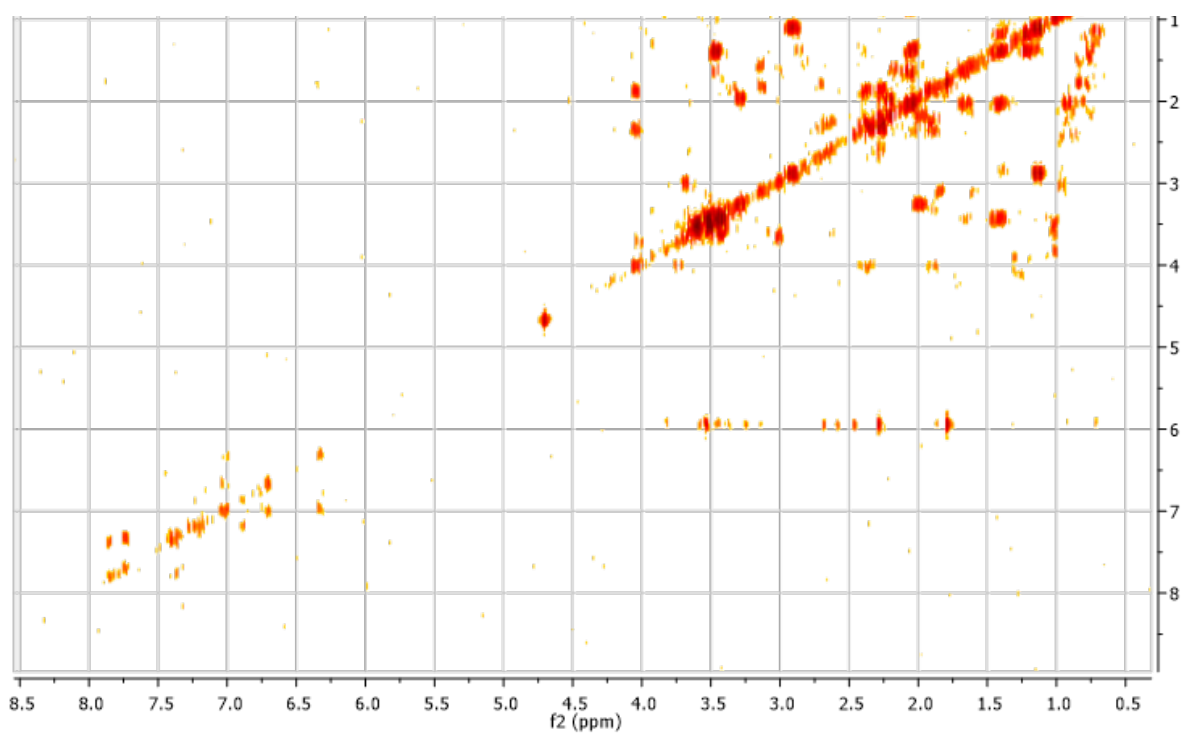

**Figure S3.**  $^1\text{H}$ ,  $^1\text{H}$ -COSY spectrum ( $\text{D}_2\text{O}$ ) of the aqueous fraction obtained at 350 °C and 10 min from pure TS.

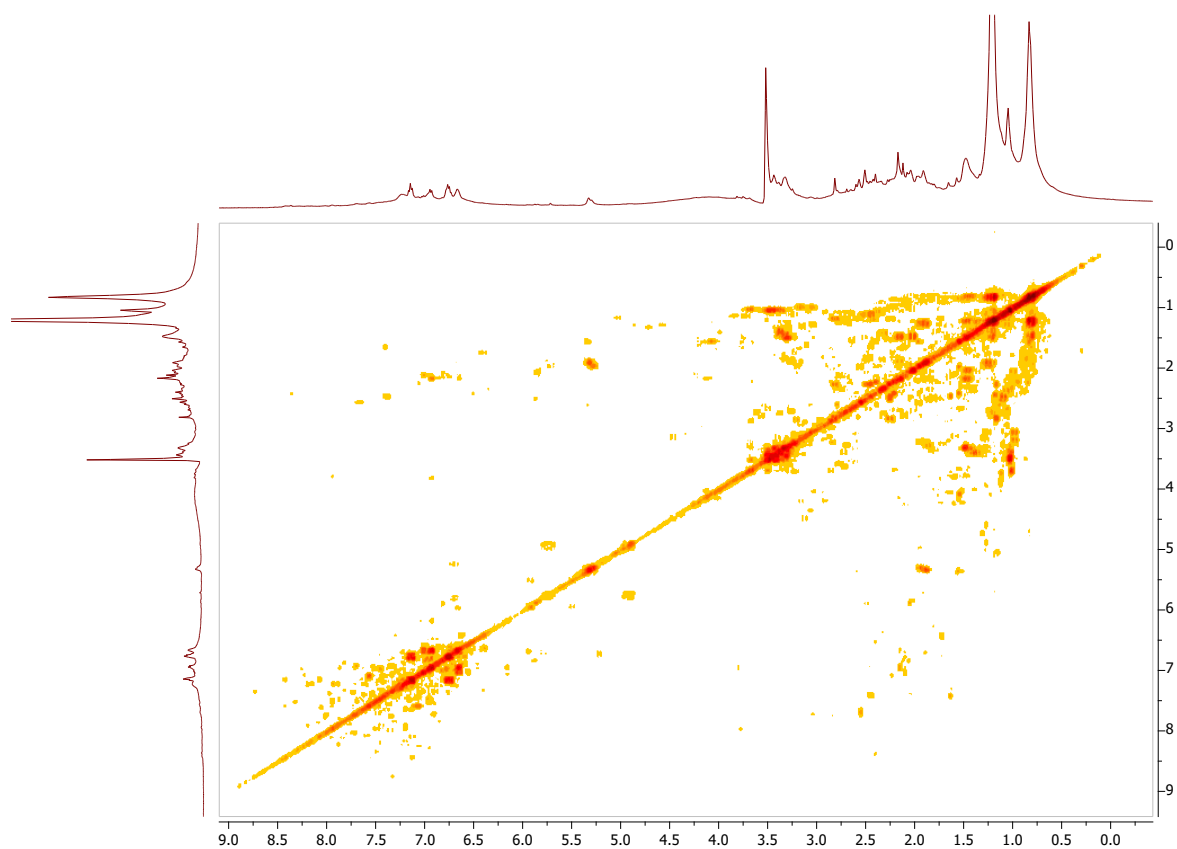

**Figure S4.**  $^1\text{H}$ ,  $^1\text{H}$ -COSY spectrum (DMSO- $d_6$ ) of the bio-crude fraction obtained at 350 °C and 10 min from a mixed sludge composed by MS:TS 75:25.

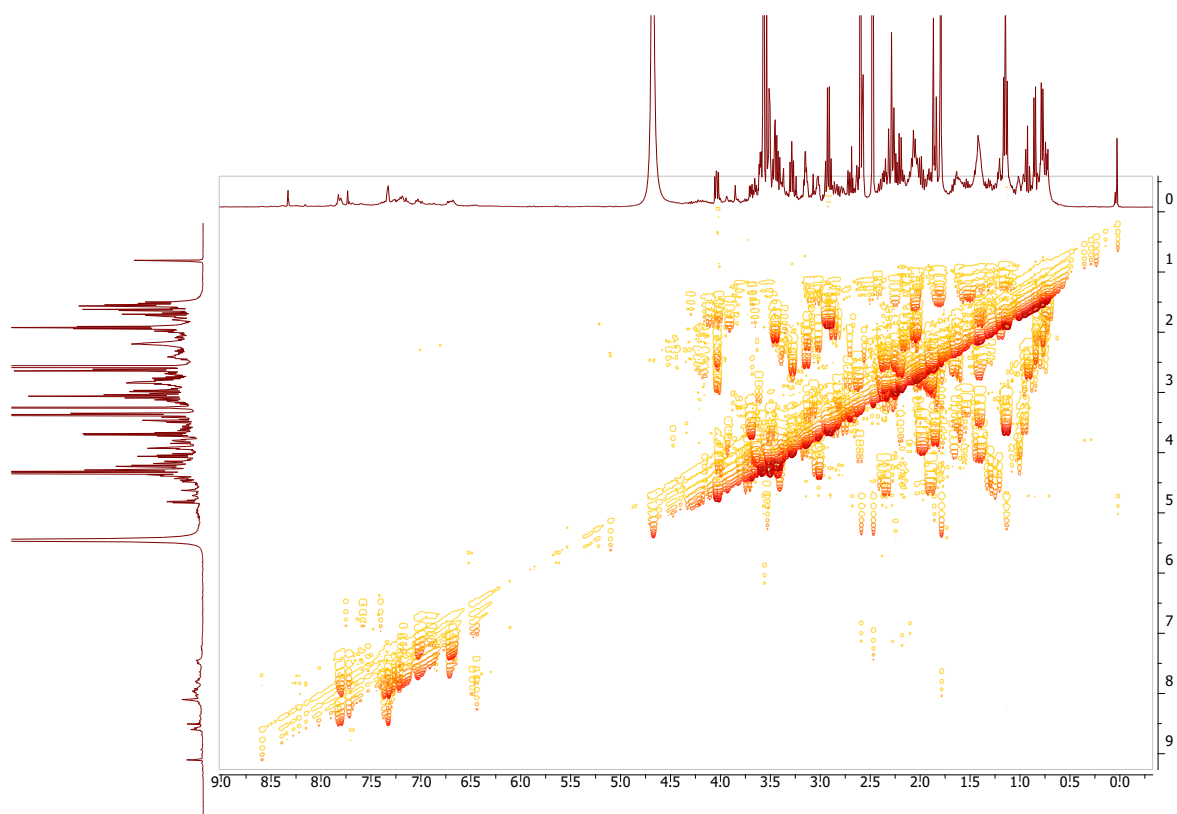

**Figure S5.**  $^1\text{H}$ ,  $^1\text{H}$ -COSY spectrum ( $\text{D}_2\text{O}$ ) of the aqueous fraction obtained at 350 °C and 10 min from a mixed sludge composed by MS:TS 75:25.
